# Supplementary material for: Transgene-Free Genome Editing in Caenorhabditis elegans Using CRISPR-Cas
Source: Oxford University Press journal article supplement (doi:10.1534/genetics.113.155879), 2013-08-27
Supplement: genetics.113.155879-3.pdf [file genetics.113.155879-3.pdf]

**Table S2 Detailed results of split-read mutation detection**

| Linkage Group | Start    | Stop     | Size    | Score | Predicted in: | Homozygous in: |
|---------------|----------|----------|---------|-------|---------------|----------------|
| I             | 1580676  | 1580681  | 5       | 10    | Both          | Both           |
| I             | 6151523  | 6151526  | 3       | 10    | Both          | Both           |
| I             | 10948442 | 10948685 | 243     | 2     | Both          | Both           |
| II            | 563219   | 563256   | 37      | 2     | <i>sy745</i>  | Both           |
| II            | 4117187  | 4117193  | 6       | 2     | <i>sy740</i>  | Both           |
| II            | 4611574  | 4611595  | 21      | 4     | <i>sy745</i>  | Both           |
| IV            | 3036896  | 3036902  | 6       | 2     | Both          | Both           |
| IV            | 8121709  | 8121716  | 7       | 5     | <i>sy740</i>  | Both           |
| IV            | 8578126  | 8580609  | 2483    | 2     | Both          | Both           |
| V             | 931548   | 931552   | 4       | 2     | Both          | Both           |
| V             | 1645712  | 1647498  | 1786    | 9     | Both          | Both           |
| V             | 5625703  | 5625715  | 12      | 12    | Both          | Both           |
| V             | 5755542  | 5756050  | 508     | 3     | Both          | Both           |
| V             | 6081823  | 6094837  | 13014   | 7     | Both          | Both           |
| V             | 7725877  | 7725881  | 4       | 2     | Both          | Both           |
| V             | 9026726  | 9026729  | 3       | 6     | Both          | Both           |
| V             | 9063330  | 9063335  | 5       | 13    | Both          | Both           |
| V             | 15434910 | 15434919 | 9       | 10    | Both          | Both           |
| V             | 19820304 | 19820370 | 66      | 2     | Both          | Both           |
| X             | 2002626  | 2002632  | 6       | 4     | Both          | Both           |
| X             | 4938588  | 4938592  | 4       | 8     | Both          | Both           |
| X             | 8941405  | 8941409  | 4       | 12    | Both          | Both           |
| X             | 8941405  | 8941409  | 4       | 8     | Both          | Both           |
| X             | 14432312 | 14432326 | 14      | 5     | Both          | Both           |
| I             | 230840   | 231919   | 1079    | 7     | Both          | Neither        |
| I             | 232747   | 237780   | 5033    | 2     | Both          | Neither        |
| I             | 238430   | 238468   | 38      | 4     | Both          | Neither        |
| I             | 246119   | 246175   | 56      | 3     | <i>sy745</i>  | Neither*       |
| I             | 3812704  | 4548148  | 735444  | 13    | Both          | Neither        |
| I             | 13156287 | 13156436 | 149     | 4     | Both          | Neither        |
| I             | 14169356 | 14386795 | 217439  | 2     | Both          | Neither        |
| II            | 2220320  | 2221389  | 1069    | 2     | Both          | Neither        |
| II            | 3775873  | 7422381  | 3646508 | 2     | <i>sy745</i>  | Neither        |
| II            | 6187749  | 6187758  | 9       | 2     | <i>sy740</i>  | Neither*       |
| II            | 12009805 | 12009852 | 47      | 2     | <i>sy740</i>  | Neither*       |
| II            | 12572308 | 12573728 | 1420    | 4     | Both          | Neither        |
| III           | 13032636 | 13032832 | 196     | 4     | <i>sy740</i>  | Neither        |
| IV            | 7727245  | 7727296  | 51      | 3     | Both          | Neither        |
| IV            | 11071120 | 11072356 | 1236    | 11    | Both          | Neither        |
| IV            | 14320741 | 14356442 | 35701   | 2     | <i>sy745</i>  | Neither        |
| IV            | 15438235 | 16899372 | 1461137 | 4     | <i>sy745</i>  | Neither        |
| V             | 3707494  | 3707683  | 189     | 2     | Both          | Neither        |
| V             | 13646108 | 13646149 | 41      | 8     | Both          | Neither*       |
| V             | 17344382 | 17344476 | 94      | 2     | <i>sy745</i>  | Neither*       |
| X             | 1614748  | 1615141  | 393     | 2     | <i>sy740</i>  | Neither*       |
| X             | 1614997  | 1615141  | 144     | 4     | Both          | Neither*       |
| X             | 7077853  | 7077873  | 20      | 3     | <i>sy740</i>  | Neither        |
| X             | 16014052 | 16014197 | 145     | 2     | <i>sy740</i>  | Neither*       |

The 48 candidate deletions predicted by split-read analysis in the *dpy-11(sy740)* and/or *dpy-11(sy745)* strains on the basis of two or more reads (“Score” in the table) are listed by linkage group, start site, end site, and size. Each was manually curated by examination of reads aligned to the reference sequence using the Burrows-Wheeler aligner. 24 of the 48 candidate deletions were homozygous in both strains; the other 24 had reads consistent with the presence of wild-type sequence at these coordinates in both strains, and so are marked as

being homozygous in neither strain. Predicted deletions in this latter class could have been represented by sequencing reads if they were present as heterozygotes, but such reads would not have been mapped to the corresponding site in the genome by the Burrows-Wheeler aligner. The candidate deletions marked with an asterisk (\*) were tested using PCR to seek smaller products as predicted (see Table S4); of these, only one was present, the predicted deletion starting at 13646108 on LGV; that deletion was predicted in both strains and was detectable by PCR in both strains, indicating that it did not result from CRISPR-Cas nuclease activity.
